# Supplementary material for: Educational utility of observational workplace-based assessment modalities in Australian vocational general practice training: a cross-sectional study
Source: Springer Nature journal article supplement (doi:10.1186/s12909-025-07328-y), 2025-05-23
Supplement: MOESM1 [file 12909_2025_7328_MOESM1_ESM.pdf]

## Additional File – Questionnaires

### Registrar Questionnaire

#### Questionnaire notes:

- For questionnaires administered within RTO2 and RTO3, the term 'Clinical Teaching Visit' and abbreviation 'CTV' is replaced with 'external Clinical Teaching Visit' / 'ECTV' in line with terminology used within these organisations.
- Variations in questions for different RTOs (arising from variations in CTV formats and terminologies used between training organisations) are indicated using the 'questionnaire allocation' and 'RTO-questionnaire allocations' columns
- As face-to-face CTVs were suspended due to COVID-19, RTO1 implemented three remote alternatives: a remote CTV session via video conferencing or telephone, a remote random case analysis session (RCA-CTV), and a remote case-based discussion session (CBD-CTV) – these are denoted and colour-coded in the master questionnaire
- Skip logic in the online questionnaire was used to deliver the correct set of questions for different modalities

| Question item | Questionnaire allocation                                                                                                 | RTO-questionnaire allocation | Question                                                                                                                                                                                                                                                                                                                                                                                                                                                                                                                                                                                                                                              | Response options                                                                                                                                                                        |
|---------------|--------------------------------------------------------------------------------------------------------------------------|------------------------------|-------------------------------------------------------------------------------------------------------------------------------------------------------------------------------------------------------------------------------------------------------------------------------------------------------------------------------------------------------------------------------------------------------------------------------------------------------------------------------------------------------------------------------------------------------------------------------------------------------------------------------------------------------|-----------------------------------------------------------------------------------------------------------------------------------------------------------------------------------------|
| 1             | Questions allocated under the following categories:<br>"Face-to-face CTV"<br>"Video/phone CTV"<br>'RCA-CTV'<br>'CBD-CTV' | RTO1 only                    | <p>Please indicate which CTV assessment you completed</p> <p>Please note:<br/><u>Face-to-face CTV:</u><br/>CT visitor is present while you see patients at your practice. <u>May</u> include telehealth consultations, random case analyses or simulated cases (role plays).<br/><u>Video/phone CTV:</u><br/>CT visitor is present via <u>Zoom/phone</u> while you see patients either face-to-face and/or via telehealth. <u>May</u> include simulated cases (role plays).<br/><u>RCA-CTV:</u><br/>CT visitor conducts a series of Random Case Analyses <u>only</u> with you via <u>Zoom/phone</u>.<br/><u>No patient consults are observed.</u></p> | <input type="radio"/> Face-to-face CTV <input type="radio"/> Video/phone CTV <input type="radio"/> Random Case Analysis (RCA)-CTV <input type="radio"/> Case Based Discussion (CBD)-CTV |

|   |                                         |               |                                                                                                                                                                    |                                                                                                                                                           |
|---|-----------------------------------------|---------------|--------------------------------------------------------------------------------------------------------------------------------------------------------------------|-----------------------------------------------------------------------------------------------------------------------------------------------------------|
|   |                                         |               | <u>CBD-CTV:</u><br>CT visitor conducts a series of Case-Based Discussions <u>only</u> with you via <u>Zoom/phone</u> .<br><u>No patient consults are observed.</u> |                                                                                                                                                           |
| 2 | Video/phone CTV <b>only</b>             | RTO1 only     | How was the CTV conducted?                                                                                                                                         | <input type="radio"/> By video <input type="radio"/> By telephone                                                                                         |
|   | RCA-CTV                                 |               | How was the RCA-CTV conducted?                                                                                                                                     | <input type="radio"/> By video <input type="radio"/> By telephone                                                                                         |
|   | CBD-CTV                                 |               | How was the CBD-CTV conducted?                                                                                                                                     | <input type="radio"/> By video <input type="radio"/> By telephone                                                                                         |
|   | Face-to-face CTV <b>and</b> Video/phone | RTO2 and RTO3 | How was the CTV conducted?                                                                                                                                         | <input type="radio"/> In person (face-to-face) <input type="radio"/> By video <input type="radio"/> By telephone                                          |
| 3 | Face-to-face CTV <b>and</b> Video/phone | All RTOs      | In what session was the CTV held?                                                                                                                                  | <input type="radio"/> Morning <input type="radio"/> Afternoon                                                                                             |
| 4 | Face-to-face CTV <b>and</b> Video/phone | ALL RTOs      | How many patients did you see during the CTV?                                                                                                                      | _____                                                                                                                                                     |
|   | RCA-CTV                                 | RTO1 only     | How many cases did you discuss during the RCA-CTV                                                                                                                  | _____                                                                                                                                                     |
|   | CBD-CTV                                 |               | How many cases did you discuss during the CBD-CTV                                                                                                                  | _____                                                                                                                                                     |
| 5 | Face-to-face CTV <b>and</b> Video/phone | All RTOs      | How many of these were telehealth consultations?                                                                                                                   | _____                                                                                                                                                     |
| 6 | Face-to-face <b>and</b> video/phone     | RTO1 only     | Did the visit include any simulated cases?                                                                                                                         | <input type="radio"/> No <input type="radio"/> Yes (how many?) ____                                                                                       |
| 7 | Face-to-face CTV <b>and</b> Video/phone | All RTOs      | Thinking about the CTV overall, how educationally useful do you feel the CTV was for you?                                                                          | <input type="radio"/> 1 - Not at all useful <input type="radio"/> 2 <input type="radio"/> 3 <input type="radio"/> 4 <input type="radio"/> 5 - Very useful |

|    |                                         |                |                                                                                                                                                                                                                             |                                                                                                                                                                                                    |
|----|-----------------------------------------|----------------|-----------------------------------------------------------------------------------------------------------------------------------------------------------------------------------------------------------------------------|----------------------------------------------------------------------------------------------------------------------------------------------------------------------------------------------------|
|    | RCA-CTV                                 | RTO1 only      | Thinking about the RCA-CTV overall, how educationally useful do you feel the RCA-CTV was for you?                                                                                                                           | <input type="radio"/> 1 - Not at all useful <input type="radio"/> 2 <input type="radio"/> 3 <input type="radio"/> 4 <input type="radio"/> 5 - Very useful                                          |
|    | CBD-CTV                                 |                | Thinking about the CBD-CTV overall, how educationally useful do you feel the CBD-CTV was for you?                                                                                                                           | <input type="radio"/> 1 - Not at all useful <input type="radio"/> 2 <input type="radio"/> 3 <input type="radio"/> 4 <input type="radio"/> 5 - Very useful                                          |
| 8  | Face-to-face CTV <b>and</b> Video/phone | RTO1 and RTO 2 | Do you feel the presence of the CT visitor affected how you performed any clinical tasks compared to your usual practice?                                                                                                   | <input type="radio"/> Not at all <input type="radio"/> Yes, a little <input type="radio"/> Yes, a lot    If yes, how (optional): ____                                                              |
|    |                                         | RTO3           | Do you feel the presence of the ECT visitor/ECTV recording affected how you performed any clinical tasks compared to your usual practice?                                                                                   |                                                                                                                                                                                                    |
| 9  | Face-to-face CTV <b>and</b> Video/phone | ALL RTOs       | Did you consult your supervisor in any way ( <u>including: face-to-face, phone, electronic messaging</u> ) during the CTV?                                                                                                  | <input type="radio"/> Yes <input type="radio"/> No                                                                                                                                                 |
| 10 | Face-to-face CTV <b>and</b> Video/phone | ALL RTOs       | During this CTV did the CT visitor conduct a Random Case Analysis (RCA) with you?<br><i>An RCA is a specific method of case note review where past records are selected at <u>random</u> by the CT visitor, not by you.</i> | <input type="radio"/> No <input type="radio"/> Yes (how many?) _____                                                                                                                               |
| 11 | Face-to-face CTV <b>and</b> Video/phone | ALL RTOs       | Of the following, which activities occurred during this CTV?                                                                                                                                                                |                                                                                                                                                                                                    |
|    | RCA-CTV                                 | RTO1 only      | Of the following, which activities occurred during this RCA-CTV?                                                                                                                                                            |                                                                                                                                                                                                    |
|    | CBD-CTV                                 |                | Of the following, which activities occurred during this CBD-CTV?                                                                                                                                                            |                                                                                                                                                                                                    |
|    | Face-to-face CTV <b>and</b> Video/phone | ALL RTOs       | a. The CT visitor gave me the opportunity to reflect on my performance.                                                                                                                                                     | <input type="radio"/> Not for any consultation <input type="radio"/> Yes, for 1 consultation <input type="radio"/> Yes, for 2 consultations <input type="radio"/> Yes, for 3 or more consultations |
|    | RCA-CTV                                 | RTO1 only      | a. The CT visitor gave me the opportunity to reflect on my performance.                                                                                                                                                     | <input type="radio"/> Not for any case <input type="radio"/> Yes, for 1 case <input type="radio"/> Yes, for 2 cases <input type="radio"/> Yes, for 3 cases                                         |

|                                                                                                             |                                  |           |                                                                                                                                                       |                                                                                                                                                                                                                                                                                                                                                                                                                                                                                                                                                                                                                                                                                                                                                                                                                  |                                               |                                                |                                                        |
|-------------------------------------------------------------------------------------------------------------|----------------------------------|-----------|-------------------------------------------------------------------------------------------------------------------------------------------------------|------------------------------------------------------------------------------------------------------------------------------------------------------------------------------------------------------------------------------------------------------------------------------------------------------------------------------------------------------------------------------------------------------------------------------------------------------------------------------------------------------------------------------------------------------------------------------------------------------------------------------------------------------------------------------------------------------------------------------------------------------------------------------------------------------------------|-----------------------------------------------|------------------------------------------------|--------------------------------------------------------|
|                                                                                                             | CBD-CTV                          |           | a. The CT visitor gave me the opportunity to reflect on my performance.                                                                               | <input type="radio"/> Not for any case                                                                                                                                                                                                                                                                                                                                                                                                                                                                                                                                                                                                                                                                                                                                                                           | <input type="radio"/> Yes, for 1 case         | <input type="radio"/> Yes, for 2 cases         | <input type="radio"/> Yes, for 3 or more cases         |
|                                                                                                             | Face-to-face CTV and Video/phone | ALL RTOs  | b. The CT visitor provided me with meaningful feedback on a specific aspect of my performance.                                                        | <input type="radio"/> Not for any consultation                                                                                                                                                                                                                                                                                                                                                                                                                                                                                                                                                                                                                                                                                                                                                                   | <input type="radio"/> Yes, for 1 consultation | <input type="radio"/> Yes, for 2 consultations | <input type="radio"/> Yes, for 3 or more consultations |
|                                                                                                             | RCA-CTV                          | RTO1 only | b. The CT visitor provided me with meaningful feedback on a specific aspect of my performance.                                                        | <input type="radio"/> Not for any case                                                                                                                                                                                                                                                                                                                                                                                                                                                                                                                                                                                                                                                                                                                                                                           | <input type="radio"/> Yes, for 1 case         | <input type="radio"/> Yes, for 2 cases         | <input type="radio"/> Yes, for 3 or more cases         |
|                                                                                                             | CBD-CTV                          |           | b. The CT visitor provided me with meaningful feedback on a specific aspect of my performance.                                                        | <input type="radio"/> Not for any case                                                                                                                                                                                                                                                                                                                                                                                                                                                                                                                                                                                                                                                                                                                                                                           | <input type="radio"/> Yes, for 1 case         | <input type="radio"/> Yes, for 2 cases         | <input type="radio"/> Yes, for 3 or more cases         |
|                                                                                                             | Face-to-face CTV and Video/phone | ALL RTOs  | c. The CT visitor <u>observed</u> me performing a physical examination (other than BP and pulse measurement).                                         | <input type="radio"/> Not for any consultation                                                                                                                                                                                                                                                                                                                                                                                                                                                                                                                                                                                                                                                                                                                                                                   | <input type="radio"/> Yes, for 1 consultation | <input type="radio"/> Yes, for 2 consultations | <input type="radio"/> Yes, for 3 or more consultations |
| 12                                                                                                          | Face-to-face CTV and Video/phone | ALL RTOs  | Regarding the consultations observed, which of the following areas (if any) did the CT visitor <u>discuss</u> with you? Please select all that apply: | <input type="checkbox"/> Identifying the reason for the consultation<br><input type="checkbox"/> Exploration of patient's problems<br><input type="checkbox"/> Consideration of the patient's agenda<br><input type="checkbox"/> Organisation and flow<br><input type="checkbox"/> Non-verbal behaviour<br><input type="checkbox"/> Developing rapport<br><input type="checkbox"/> Appropriateness of physical examination components performed/proposed<br><input type="checkbox"/> Physical examination technique<br><input type="checkbox"/> Diagnosis<br><input type="checkbox"/> Explanation of diagnosis to patient<br><input type="checkbox"/> Specific patient and/or location contextual factors relevant to the consultation(s)<br>(e.g. rural/remote, socioeconomic, Aboriginal and/or Torres Strait) |                                               |                                                |                                                        |
| Note for item 12, response options are the same across all formats. Variation in question terminology only. | RCA-CTV                          | RTO1 only | Regarding the cases reviewed, which of the following areas (if any) did the CT visitor <u>discuss</u> with you? Please select all that apply:         | <input type="checkbox"/> Time management<br><input type="checkbox"/> Management planning<br><input type="checkbox"/> Appropriate medications<br><input type="checkbox"/> Appropriate investigations<br><input type="checkbox"/> Medication prescribing processes<br><input type="checkbox"/> Documentation in patients' medical records<br><input type="checkbox"/> Referrals<br><input type="checkbox"/> Patient follow-up<br><input type="checkbox"/> Dealing with uncertainty<br><input type="checkbox"/> Safety netting<br>(Contingency planning with the patient to provide a management strategy for a change in symptoms, including explicit instruction for action(s) given specific circumstances)                                                                                                      |                                               |                                                |                                                        |
|                                                                                                             | CBD-CTV                          |           | Regarding the cases reviewed, which of the following areas (if any) did the CT visitor <u>discuss</u> with you? Please select all that apply:         |                                                                                                                                                                                                                                                                                                                                                                                                                                                                                                                                                                                                                                                                                                                                                                                                                  |                                               |                                                |                                                        |

|    |                                       |           |                                                                                                                                        |                                                                                                                                                                                                                                                                |
|----|---------------------------------------|-----------|----------------------------------------------------------------------------------------------------------------------------------------|----------------------------------------------------------------------------------------------------------------------------------------------------------------------------------------------------------------------------------------------------------------|
|    |                                       |           |                                                                                                                                        | Islander, non-English speaking background factors)                                                                                                                                                                                                             |
| 13 | Face-to-face CTV and Video/phone      | ALL RTOs  | Thinking about the feedback you received in the CTV session, how would you classify the overall quality of the feedback?               | <div> <input type="radio"/> 1 - Broad, non-specific; difficult for me to translate into action <input type="radio"/> 2 <input type="radio"/> 3 <input type="radio"/> 4 <input type="radio"/> 5 - focused/specific; easy for me to translate into action </div> |
|    | RCA-CTV                               | RTO1 only | Thinking about the feedback you received in the RCA-CTV session, how would classify the overall quality of the feedback?               | <div> <input type="radio"/> 1 - Broad, non-specific; difficult for me to translate into action <input type="radio"/> 2 <input type="radio"/> 3 <input type="radio"/> 4 <input type="radio"/> 5 - focused/specific; easy for me to translate into action </div> |
|    | CBD-CTV                               |           | Thinking about the feedback you received in the CBD-CTV session, how would classify the overall quality of the feedback?               | <div> <input type="radio"/> 1 - Broad, non-specific; difficult for me to translate into action <input type="radio"/> 2 <input type="radio"/> 3 <input type="radio"/> 4 <input type="radio"/> 5 - focused/specific; easy for me to translate into action </div> |
| 14 | All                                   | ALL RTOs  | How consistent did you find CT visitor feedback with the feedback you have previously received from your supervisor?                   | <div> <input type="radio"/> 1 – not at all consistent <input type="radio"/> 2 <input type="radio"/> 3 <input type="radio"/> 4 <input type="radio"/> 5 – very consistent <input type="radio"/> I didn't receive any feedback </div>                             |
| 15 | All                                   | ALL RTOs  | How likely are you to change the way you practice as a result of the feedback you received from the CT visitor?                        | <div> <input type="radio"/> 1 – not at all likely <input type="radio"/> 2 <input type="radio"/> 3 <input type="radio"/> 4 <input type="radio"/> 5 – very likely <input type="radio"/> I didn't receive any feedback </div>                                     |
| 16 | All                                   | ALL RTOs  | How likely are you to change your approach to learning or your training as a result of the feedback you received from the CT visitor?  | <div> <input type="radio"/> 1 – not at all likely <input type="radio"/> 2 <input type="radio"/> 3 <input type="radio"/> 4 <input type="radio"/> 5 – very likely <input type="radio"/> I didn't receive any feedback </div>                                     |
| 17 | Both Face-to-face CTV and Video/phone | ALL RTOs  | Is there anything else you would like to comment on regarding the content, educational usefulness, or any other aspect of the CTV?     | _____                                                                                                                                                                                                                                                          |
|    | RCA-CTV                               | RTO1 only | Is there anything else you would like to comment on regarding the content, educational usefulness, or any other aspect of the RCA-CTV? | _____                                                                                                                                                                                                                                                          |

|    |         |           |                                                                                                                                        |                                                                                                                                                                        |
|----|---------|-----------|----------------------------------------------------------------------------------------------------------------------------------------|------------------------------------------------------------------------------------------------------------------------------------------------------------------------|
|    | CBD-CTV |           | Is there anything else you would like to comment on regarding the content, educational usefulness, or any other aspect of the CBD-CTV? | _____                                                                                                                                                                  |
| 18 | All     | ALL RTOs  | What best describes your gender?                                                                                                       | <input type="radio"/> Male <input type="radio"/> Female <input type="radio"/> Prefer to self-describe as: _____ (optional) <input type="radio"/> Prefer not to say     |
| 19 | All     | ALL RTOs  | Your age                                                                                                                               | _____                                                                                                                                                                  |
| 20 | All     | ALL RTOs  | Where did you qualify as a doctor (primary medical degree)?                                                                            | <input type="radio"/> Australia <input type="radio"/> Other, please specify _____                                                                                      |
| 21 | All     | ALL RTOs  | Which specialist GP Fellowship are you working towards? (tick all that are applicable)                                                 | <input type="checkbox"/> FRACGP <input type="checkbox"/> FARGP <input type="checkbox"/> ACRRM                                                                          |
| 22 | All     | ALL RTOs  | Regarding your current training, are you enrolled                                                                                      | <input type="radio"/> Full-time <input type="radio"/> Part-time                                                                                                        |
| 23 | All     | ALL RTOs  | Which training term are you doing now?                                                                                                 | <input type="radio"/> GPT1 and/or PRR1 <input type="radio"/> GPT2 and/or PRR2 <input type="radio"/> GPT3 and/or PRR3 <input type="radio"/> Other, please specify _____ |
| 24 | All     | RTO1 only | Which pathway are you currently enrolled in?                                                                                           | <input type="radio"/> General <input type="radio"/> Rural                                                                                                              |
| 25 | All     | ALL RTOs  | How many GPs (full time equivalents) work with you at the practice where your CTV was conducted?                                       | <input type="radio"/> <2 <input type="radio"/> 2-4 <input type="radio"/> 5-9 <input type="radio"/> >10                                                                 |
| 26 | All     | ALL RTOs  | How many hours do you work each week as a GP?<br><i>Include only face-to-face, rostered, patient consultation time</i>                 | _____                                                                                                                                                                  |

## CT Visitor Questionnaire

### Questionnaire notes:

- For questionnaires administered within RTO2 and RTO3, the term 'Clinical Teaching Visit' and abbreviation 'CTV' is replaced with 'external Clinical Teaching Visit' / 'ECTV' in line with terminology used within these organisations.
- Variations in questions for different RTOs (arising from variations in CTV formats and terminologies used between training organisations) are indicated using the 'questionnaire allocation' and 'RTO-questionnaire allocations' columns
- As face-to-face CTVs were suspended due to COVID-19, RTO1 implemented three remote alternatives: a remote CTV session via video conferencing or telephone, a remote random case analysis session (RCA-CTV), and a remote case-based discussion session (CBD-CTV) – these are denoted and colour-coded in the master questionnaire
- Skip logic in the online questionnaire was used to deliver the correct set of questions for different modalities

| Question item | Questionnaire allocation                                                                     | RTO-questionnaire allocation | Question                                                                                                                                                                                                                                                                                                                                                                                                                                                                                                                                                                                                                                                                                                                                                        | Response options                                                                                                                                                                        |
|---------------|----------------------------------------------------------------------------------------------|------------------------------|-----------------------------------------------------------------------------------------------------------------------------------------------------------------------------------------------------------------------------------------------------------------------------------------------------------------------------------------------------------------------------------------------------------------------------------------------------------------------------------------------------------------------------------------------------------------------------------------------------------------------------------------------------------------------------------------------------------------------------------------------------------------|-----------------------------------------------------------------------------------------------------------------------------------------------------------------------------------------|
| 1             | Denoted as belonging to the following questionnaires<br>'Live CTV'<br>'RCA-CTV'<br>'CBD-CTV' | RTO1 only                    | <p>Please indicate which CTV assessment you conducted with the registrar.</p> <p>Please note:<br/> <u>Face-to-face CTV:</u><br/>           CT visitor is present while the registrar sees patients at their practice. <u>May</u> include telehealth consultations, random case analyses or simulated cases (role plays).<br/> <u>Video/phone CTV:</u><br/>           CT visitor is present via <u>Zoom/phone</u> while the registrar sees patients either face-to-face and/or via telehealth. <u>May</u> include simulated cases (role plays).<br/> <u>RCA-CTV:</u><br/>           CT visitor conducts a series of Random Case Analyses <u>only</u> with the registrar via <u>Zoom/phone</u>. <u>No patient consults are observed.</u><br/> <u>CBD-CTV:</u></p> | <input type="radio"/> Face-to-face CTV <input type="radio"/> Video/phone CTV <input type="radio"/> Random Case Analysis (RCA)-CTV <input type="radio"/> Case Based Discussion (CBD)-CTV |

|   |                                         |               |                                                                                                                                                        |                                                                                                                                                           |
|---|-----------------------------------------|---------------|--------------------------------------------------------------------------------------------------------------------------------------------------------|-----------------------------------------------------------------------------------------------------------------------------------------------------------|
|   |                                         |               | CT visitor conducts a series of Case-Based Discussions <u>only</u> with the registrar via <u>Zoom/phone</u> . <u>No patient consults are observed.</u> |                                                                                                                                                           |
| 2 | Video/phone <b>only</b>                 | RTO1 only     | How was the CTV conducted?                                                                                                                             | <input type="radio"/> By video <input type="radio"/> By telephone                                                                                         |
|   | RCA-CTV                                 |               | How was the RCA-CTV conducted?                                                                                                                         | <input type="radio"/> By video <input type="radio"/> By telephone                                                                                         |
|   | CBD-CTV                                 |               | How was the CBD-CTV conducted?                                                                                                                         | <input type="radio"/> By video <input type="radio"/> By telephone                                                                                         |
|   | Face-to-face CTV <b>and</b> Video/phone | RTO2 and RTO3 | How was the CTV conducted?                                                                                                                             | <input type="radio"/> In person (Face-to-Face) <input type="radio"/> By video <input type="radio"/> By telephone                                          |
| 3 | Face-to-face CTV <b>and</b> Video/phone | All RTOs      | In what session was the CTV held?                                                                                                                      | <input type="radio"/> Morning <input type="radio"/> Afternoon                                                                                             |
| 4 | Face-to-face CTV <b>and</b> Video/phone | ALL RTOs      | How many patients did the registrar see during the CTV?                                                                                                | _____                                                                                                                                                     |
|   | RCA-CTV                                 | RTO1 only     | How many cases did you discuss with the registrar during the RCA-CTV                                                                                   | _____                                                                                                                                                     |
|   | CBD-CTV                                 |               | How many cases did you discuss with the registrar during the CBD-CTV                                                                                   | _____                                                                                                                                                     |
| 5 | Face to face CTV <b>and</b> Video/phone | ALL RTOs      | How many of these were telehealth consultations?                                                                                                       | _____                                                                                                                                                     |
| 6 | Face to face CTV <b>and</b> Video/phone | RTO1          | Did the visit include any simulated cases?                                                                                                             | <input type="radio"/> No <input type="radio"/> Yes (how many?) _____                                                                                      |
| 7 | Face-to-face CTV <b>and</b> Video/phone | All RTOs      | Thinking about the CTV overall, how educationally useful do you feel the CTV was for the registrar?                                                    | <input type="radio"/> 1 - Not at all useful <input type="radio"/> 2 <input type="radio"/> 3 <input type="radio"/> 4 <input type="radio"/> 5 - Very useful |



|    |                                         |           |                                                                                                                                                                                                                |                                                                                                                                                                                                    |
|----|-----------------------------------------|-----------|----------------------------------------------------------------------------------------------------------------------------------------------------------------------------------------------------------------|----------------------------------------------------------------------------------------------------------------------------------------------------------------------------------------------------|
|    | RCA-CTV                                 | RTO1 only | Thinking about the RCA-CTV overall, how educationally useful do you feel the RCA - CTV was for the registrar?                                                                                                  | <input type="radio"/> 1 - Not at all useful <input type="radio"/> 2 <input type="radio"/> 3 <input type="radio"/> 4 <input type="radio"/> 5 - Very useful                                          |
|    | CBD-CTV                                 |           | Thinking about the CBD-CTV overall, how educationally useful do you feel the CBD-CTV was for the registrar?                                                                                                    | <input type="radio"/> 1 - Not at all useful <input type="radio"/> 2 <input type="radio"/> 3 <input type="radio"/> 4 <input type="radio"/> 5 - Very useful                                          |
| 8  | Face-to-face CTV <b>and</b> Video/phone | ALL RTOs  | Did the registrar consult with their supervisor in any way ( <u>including: face-to-face, phone, electronic messaging</u> ) during the CTV?                                                                     | <input type="radio"/> Yes <input type="radio"/> No                                                                                                                                                 |
| 9  | Face-to-face CTV <b>and</b> Video/phone | ALL RTOs  | During the CTV did you conduct a Random Case Analysis (RCA) with the registrar?<br><i>An RCA is a specific method of case note review where past records are selected at random by you, not the registrar.</i> | <input type="radio"/> No         Yes (how many?) _____                                                                                                                                             |
| 10 | Face-to-face CTV <b>and</b> Video/phone | ALL RTOs  | Of the following, which activities occurred during this CTV?                                                                                                                                                   |                                                                                                                                                                                                    |
|    | RCA-CTV                                 | RTO1 only | Of the following, which activities occurred during this RCA-CTV?                                                                                                                                               |                                                                                                                                                                                                    |
|    | CBD-CTV                                 |           | Of the following, which activities occurred during this CBD-CTV?                                                                                                                                               |                                                                                                                                                                                                    |
|    | Face-to-face CTV <b>and</b> Video/phone | ALL RTOs  | a. I gave the registrar an opportunity to reflect on their performance.                                                                                                                                        | <input type="radio"/> Not for any consultation <input type="radio"/> Yes, for 1 consultation <input type="radio"/> Yes, for 2 consultations <input type="radio"/> Yes, for 3 or more consultations |
|    | RCA-CTV                                 | RTO1      | a. I gave the registrar an opportunity to reflect on their performance.                                                                                                                                        | <input type="radio"/> Not for any case <input type="radio"/> Yes, for 1 case <input type="radio"/> Yes, for 2 cases <input type="radio"/> Yes, for 3 or more cases                                 |
|    | CBD-CTV                                 |           | a. I gave the registrar an opportunity to reflect on their performance.                                                                                                                                        | <input type="radio"/> Not for any case <input type="radio"/> Yes, for 1 case <input type="radio"/> Yes, for 2 cases <input type="radio"/> Yes, for 3 or more cases                                 |

|                                                                                                             |                                         |           |                                                                                                                                                      |                                                                                                                                                                                                                                                                                                                                                                                                                                                                                                                                                                                                                                                                                                                                                                                                                                                                           |                                               |                                                |                                                        |
|-------------------------------------------------------------------------------------------------------------|-----------------------------------------|-----------|------------------------------------------------------------------------------------------------------------------------------------------------------|---------------------------------------------------------------------------------------------------------------------------------------------------------------------------------------------------------------------------------------------------------------------------------------------------------------------------------------------------------------------------------------------------------------------------------------------------------------------------------------------------------------------------------------------------------------------------------------------------------------------------------------------------------------------------------------------------------------------------------------------------------------------------------------------------------------------------------------------------------------------------|-----------------------------------------------|------------------------------------------------|--------------------------------------------------------|
|                                                                                                             | Face-to-face CTV <b>and</b> Video/phone | ALL RTOs  | b. I gave feedback to the registrar on a specific aspect of their performance                                                                        | <input type="radio"/> Not for any consultation                                                                                                                                                                                                                                                                                                                                                                                                                                                                                                                                                                                                                                                                                                                                                                                                                            | <input type="radio"/> Yes, for 1 consultation | <input type="radio"/> Yes, for 2 consultations | <input type="radio"/> Yes, for 3 or more consultations |
|                                                                                                             | RCA-CTV                                 | RTO1      | b. I gave feedback to the registrar on a specific aspect of their performance                                                                        | <input type="radio"/> Not for any case                                                                                                                                                                                                                                                                                                                                                                                                                                                                                                                                                                                                                                                                                                                                                                                                                                    | <input type="radio"/> Yes, for 1 case         | <input type="radio"/> Yes, for 2 cases         | <input type="radio"/> Yes, for 3 or more cases         |
|                                                                                                             | CBD-CTV                                 |           | b. I gave feedback to the registrar on a specific aspect of their performance                                                                        | <input type="radio"/> Not for any case                                                                                                                                                                                                                                                                                                                                                                                                                                                                                                                                                                                                                                                                                                                                                                                                                                    | <input type="radio"/> Yes, for 1 case         | <input type="radio"/> Yes, for 2 cases         | <input type="radio"/> Yes, for 3 or more cases         |
|                                                                                                             | Face-to-face CTV <b>only</b>            | ALL RTOs  | c. I <u>observed</u> the registrar performing a physical examination (other than BP and pulse measurement).                                          | <input type="radio"/> Not for any consultation                                                                                                                                                                                                                                                                                                                                                                                                                                                                                                                                                                                                                                                                                                                                                                                                                            | <input type="radio"/> Yes, for 1 consultation | <input type="radio"/> Yes, for 2 consultations | <input type="radio"/> Yes, for 3 or more consultations |
| 11                                                                                                          | Face-to-face CTV <b>and</b> Video/phone | ALL RTOs  | Regarding the consultations observed, which of the following areas (if any) did you <u>discuss</u> with the registrar? Please select all that apply: | <input type="checkbox"/> Identifying the reason for the consultation<br><input type="checkbox"/> Exploration of patient's problems<br><input type="checkbox"/> Consideration of the patient's agenda<br><input type="checkbox"/> Organisation and flow<br><input type="checkbox"/> Non-verbal behaviour<br><input type="checkbox"/> Developing rapport<br><input type="checkbox"/> Appropriateness of physical examination components performed/proposed<br><input type="checkbox"/> Physical examination technique<br><input type="checkbox"/> Diagnosis<br><input type="checkbox"/> Explanation of diagnosis to patient<br><input type="checkbox"/> Specific patient and/or location contextual factors relevant to the consultation(s)<br><i>(e.g. rural/remote, socioeconomic, Aboriginal and/or Torres Strait Islander, non-English speaking background factors)</i> |                                               |                                                |                                                        |
| Note for item 11, response options are the same across all formats. Variation in question terminology only. | RCA-CTV                                 | RTO1 only | Regarding the cases reviewed, which of the following areas (if any) did you <u>discuss</u> with the registrar? Please select all that apply:         | <input type="checkbox"/> Time management<br><input type="checkbox"/> Management planning<br><input type="checkbox"/> Appropriate medications<br><input type="checkbox"/> Appropriate investigations<br><input type="checkbox"/> Medication prescribing processes<br><input type="checkbox"/> Documentation in patients' medical records<br><input type="checkbox"/> Referrals<br><input type="checkbox"/> Patient follow-up<br><input type="checkbox"/> Dealing with uncertainty<br><input type="checkbox"/> Safety netting<br><i>(Contingency planning with the patient to provide a management strategy for a change in symptoms, including explicit instruction for action(s) given specific circumstances)</i>                                                                                                                                                        |                                               |                                                |                                                        |
|                                                                                                             | CBD-CTV                                 |           | Regarding the cases reviewed, which of the following areas (if any) did you <u>discuss</u> with the registrar? Please select all that apply:         |                                                                                                                                                                                                                                                                                                                                                                                                                                                                                                                                                                                                                                                                                                                                                                                                                                                                           |                                               |                                                |                                                        |
| 12                                                                                                          | Face-to-face CTV <b>and</b> Video/phone | ALL RTOs  | Is there anything else you would like to comment on regarding the content, educational usefulness, or any other aspect of the CTV?                   | <hr/>                                                                                                                                                                                                                                                                                                                                                                                                                                                                                                                                                                                                                                                                                                                                                                                                                                                                     |                                               |                                                |                                                        |

|    |         |           |                                                                                                                                        |                                                                                                                                                                                                                   |
|----|---------|-----------|----------------------------------------------------------------------------------------------------------------------------------------|-------------------------------------------------------------------------------------------------------------------------------------------------------------------------------------------------------------------|
|    | RCA-CTV | RTO1 only | Is there anything else you would like to comment on regarding the content, educational usefulness, or any other aspect of the RCA-CTV? | _____                                                                                                                                                                                                             |
|    | CBD-CTV |           | Is there anything else you would like to comment on regarding the content, educational usefulness, or any other aspect of the CBD-CTV? | _____                                                                                                                                                                                                             |
| 13 | All     | ALL RTOs  | Is this the first time you have participated in this questionnaire (in 2020) about a CTV, RCA-CTV, or CBD-CTV?                         | <input type="radio"/> Yes <input type="radio"/> No <input type="radio"/> Unsure                                                                                                                                   |
| 14 | All     | ALL RTOs  | What best describes your gender?                                                                                                       | <input type="radio"/> Male <input type="radio"/> Female <input type="radio"/> Prefer to self-describe as: _____ (optional) <input type="radio"/> Prefer not to say                                                |
| 15 | All     | ALL RTOs  | Your age                                                                                                                               | _____                                                                                                                                                                                                             |
| 16 | All     | ALL RTOs  | Where did you qualify as a doctor (primary medical degree)?                                                                            | <input type="radio"/> Australia <input type="radio"/> Other, please specify _____                                                                                                                                 |
| 17 | All     | ALL RTOs  | Which specialist GP Fellowship did you complete? (tick all that are applicable)                                                        | <input type="checkbox"/> FRACGP <input type="checkbox"/> FARGP <input type="checkbox"/> ACRRM <input type="checkbox"/> Other (optional please specify): _____                                                     |
| 18 | All     | ALL RTOs  | How many years since you gained fellowship?                                                                                            | _____                                                                                                                                                                                                             |
| 19 | All     | ALL RTOs  | How many hours do you work each week as a GP?<br><i>Include only face-to-face, rostered, patient consultation time</i>                 | _____                                                                                                                                                                                                             |
| 20 | All     | ALL RTOs  | What best describes the location of your current practice?                                                                             | <input type="radio"/> Major city (RA1) <input type="radio"/> Inner regional area (RA2) <input type="radio"/> Outer regional area (RA3) <input type="radio"/> Remote (RA4) <input type="radio"/> Very remote (RA5) |
| 21 | All     | ALL RTOs  | Are you currently or have you previously (within the past five years) been in any of the following medical education roles?            |                                                                                                                                                                                                                   |

|    |     |          |                                               |                                 |                                  |                           |
|----|-----|----------|-----------------------------------------------|---------------------------------|----------------------------------|---------------------------|
|    |     |          | Medical Educator (vocational training)        | <input type="radio"/> Currently | <input type="radio"/> Previously | <input type="radio"/> N/A |
|    |     |          | Accredited GP supervisor                      | <input type="radio"/> Currently | <input type="radio"/> Previously | <input type="radio"/> N/A |
|    |     |          | Examiner for ACRRM Fellowship exams           | <input type="radio"/> Currently | <input type="radio"/> Previously | <input type="radio"/> N/A |
|    |     |          | Examiner for RACGP Fellowship exams           | <input type="radio"/> Currently | <input type="radio"/> Previously | <input type="radio"/> N/A |
|    |     |          | Clinical Teaching Visitor                     | <input type="radio"/> Currently | <input type="radio"/> Previously | <input type="radio"/> N/A |
| 22 | All | ALL RTOs | How many years have you been performing CTVs? | <hr/>                           |                                  |                           |
